# Supplementary material for: Oral intake of rice overexpressing ubiquitin ligase inhibitory pentapeptide prevents atrophy in denervated skeletal muscle
Source: PubMed Central journal article supplement (PMC8429733; doi:10.1038/s41538-021-00108-0), 2021-09-09
Supplement: 41538_2021_108_MOESM1_ESM.pdf [file 41538_2021_108_MOESM1_ESM.pdf]

1 Oral intake of rice overexpressing ubiquitin ligase inhibitory pentapeptide prevents atrophy in  
2 denervated skeletal muscle

3 Reiko Nakao<sup>1\*</sup>, Weilin Shen<sup>2\*</sup>, Yasuka Shimajiri<sup>3,4\*</sup>, Kumiko Kainou<sup>3</sup>, Yuki Sato<sup>1</sup>, Anayt Ulla<sup>1</sup>,  
4 Kohta Ohnishi<sup>5</sup>, Miyuki Ninomiya<sup>1</sup>, Ayako Ohno<sup>1</sup>, Takayuki Uchida<sup>1</sup>, Mitsuru Tanaka<sup>2</sup>, Kazuhito  
5 Akama<sup>3</sup>, Toshiro Matsui<sup>2</sup>, Takeshi Nikawa<sup>1</sup>

6  
7 <sup>1</sup>Department of Nutritional Physiology, <sup>5</sup>Department of Clinical Nutrition and Food  
8 Management, Institute of Biomedical Sciences, Tokushima University Graduate School,  
9 Tokushima, Tokushima 770-8503, Japan

10 <sup>2</sup>Division of Bioresources and Bioenvironmental Sciences, Faculty of Agriculture, Graduate  
11 School, Kyushu University, Fukuoka, Fukuoka 819-0395, Japan

12 <sup>3</sup>Department of Life Science, Shimane University, Matsue, Shimane 690-8504, Japan

13 <sup>4</sup>EditForce, Fukuoka, Fukuoka 810-0001, Japan

14

15 \*These authors contributed equally to this work.

16 **Supplementary information**

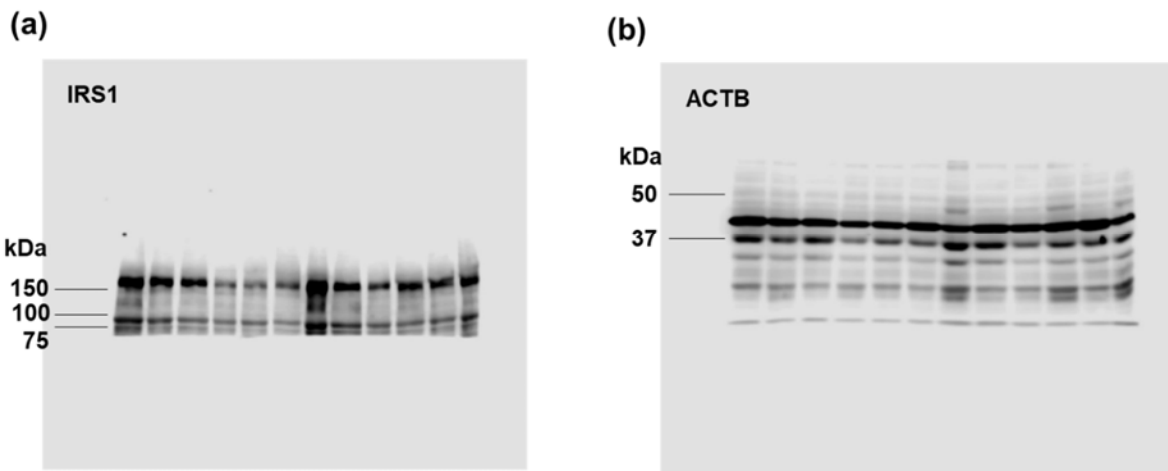

17

18

19 Supplementary Figure 1. Full-size blots of polyacrylamide gels.

20 Images of actual IRS1 and ACTB blots shown in Figure 5. Image size varies because membrane

21 was cut to blot several proteins.

22

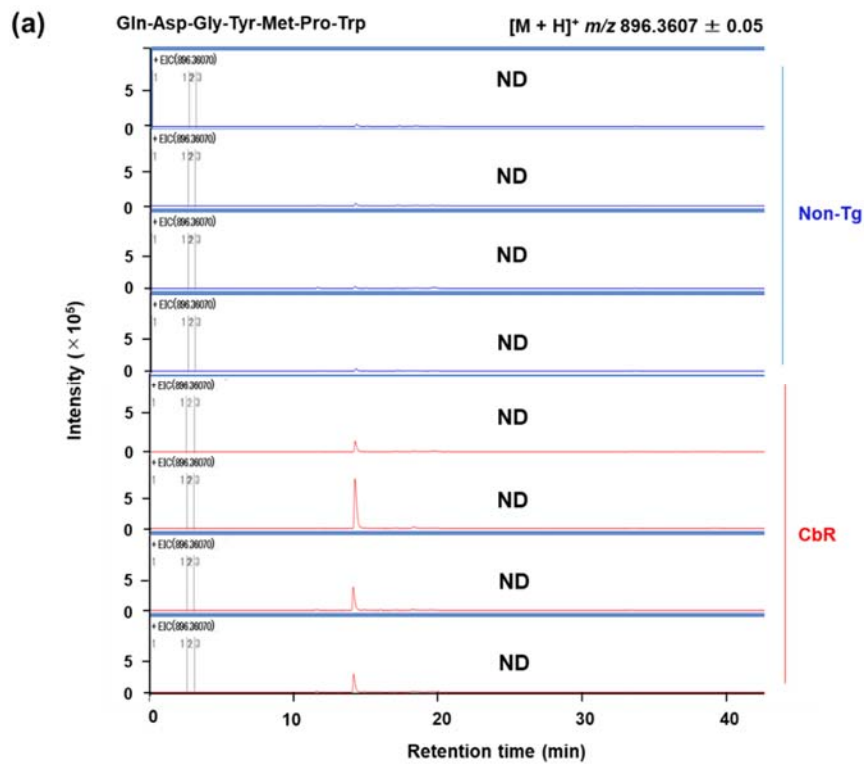

23

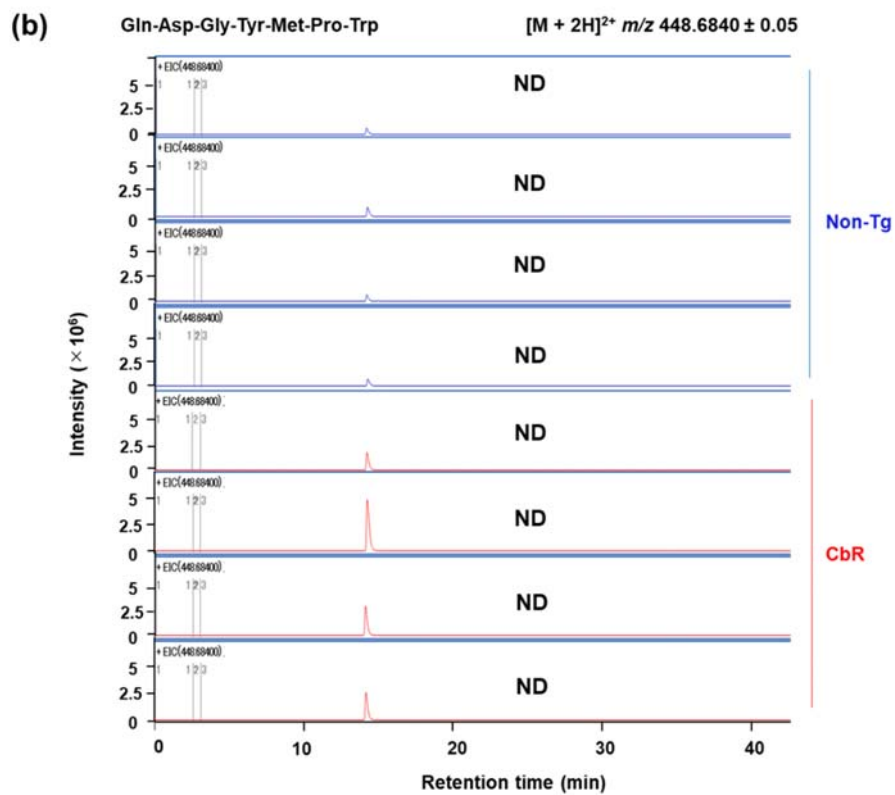

24

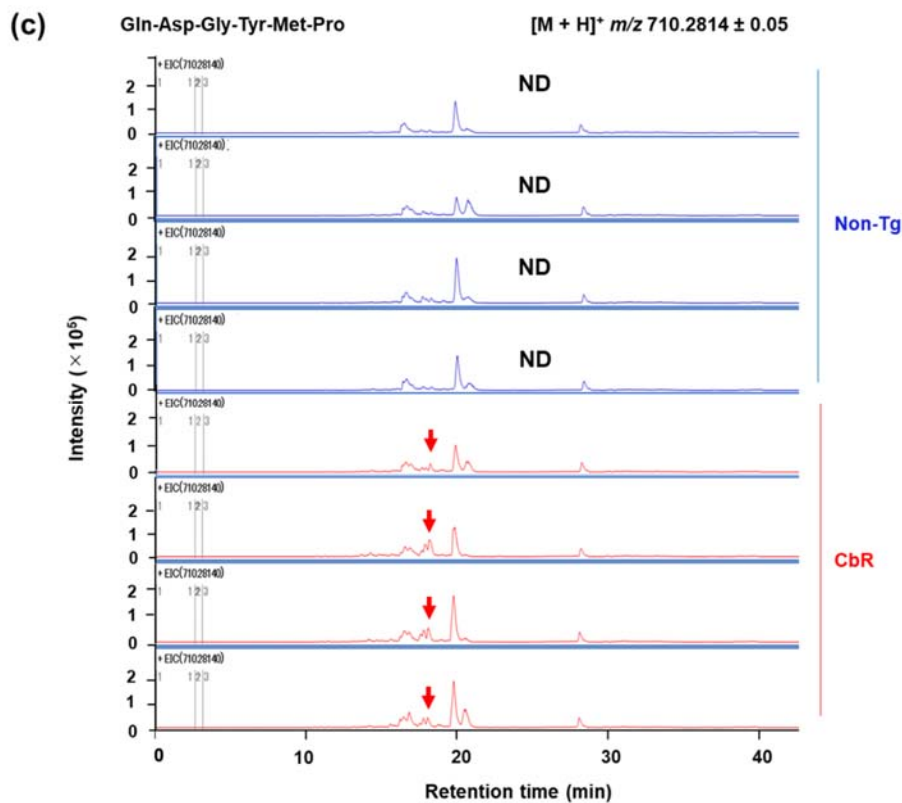

25

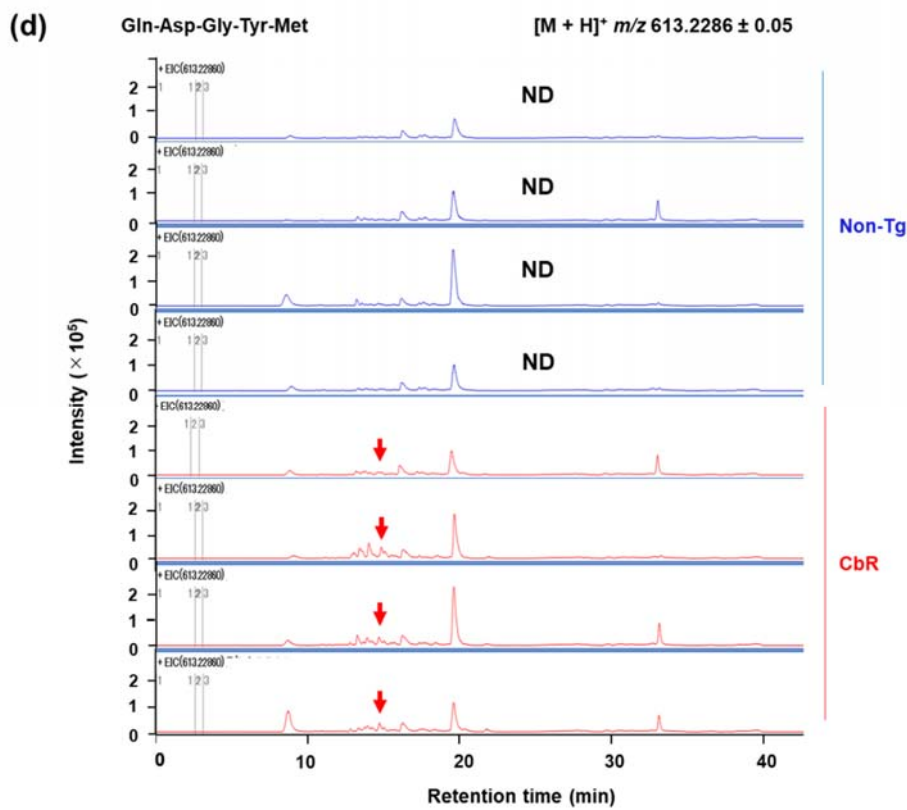

26

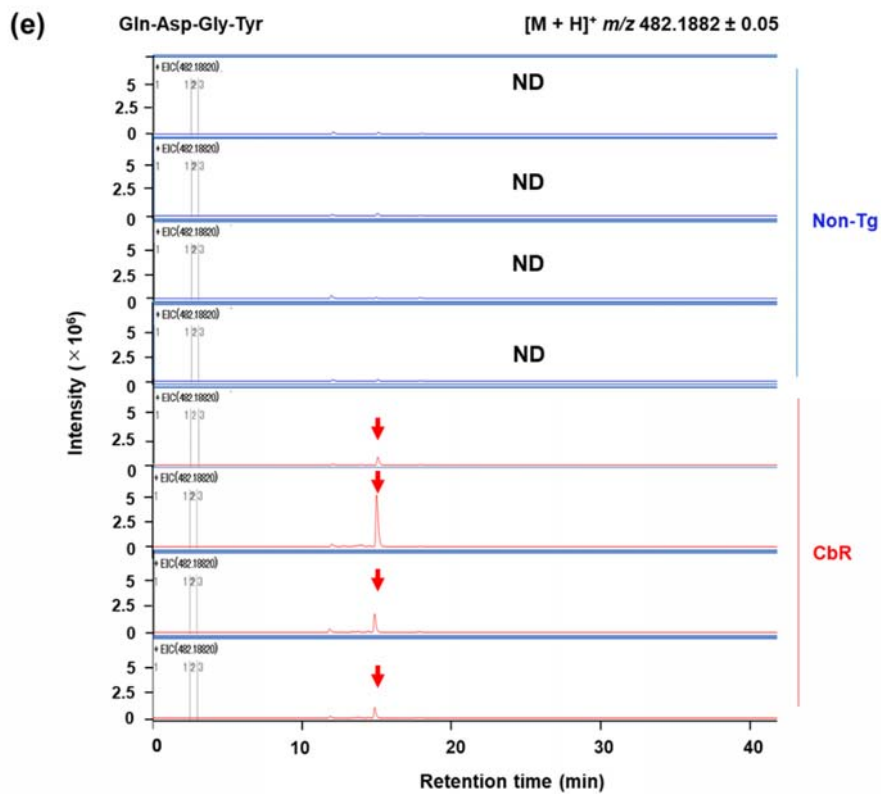

27

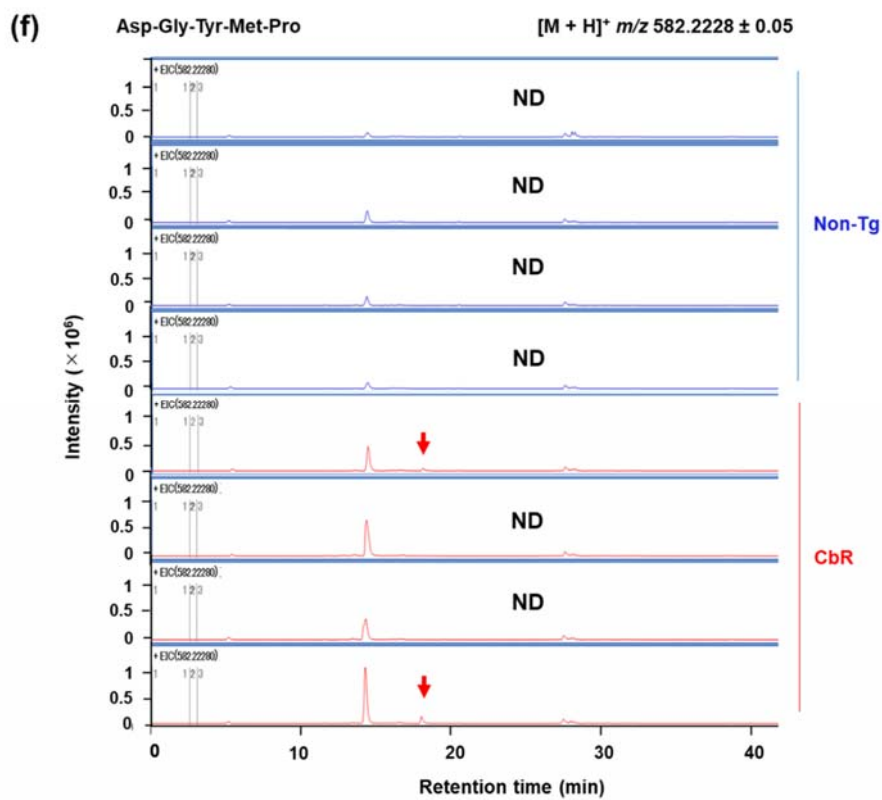

28

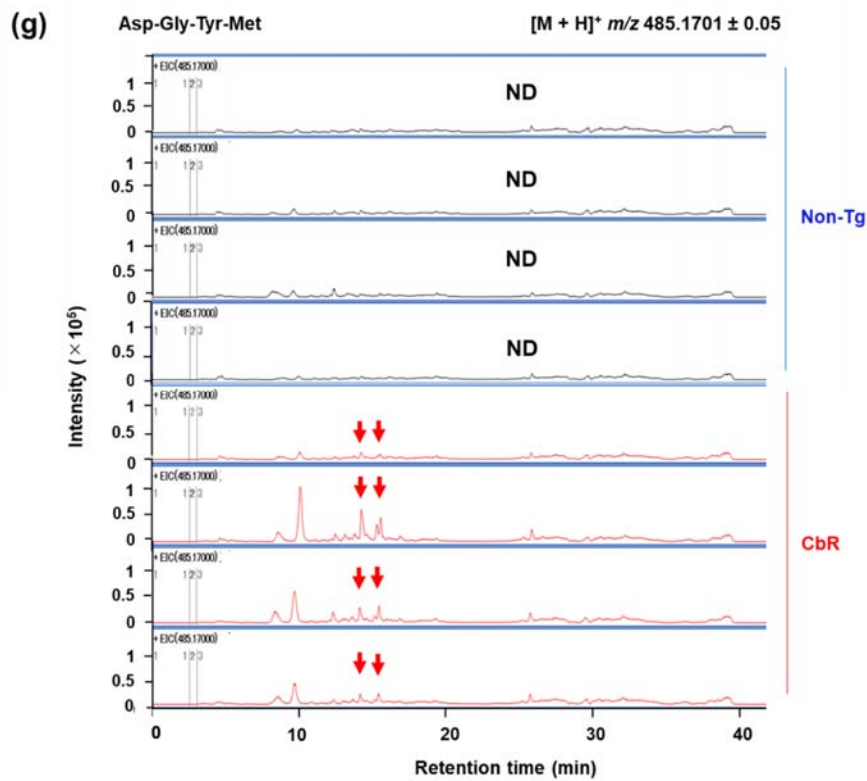

29

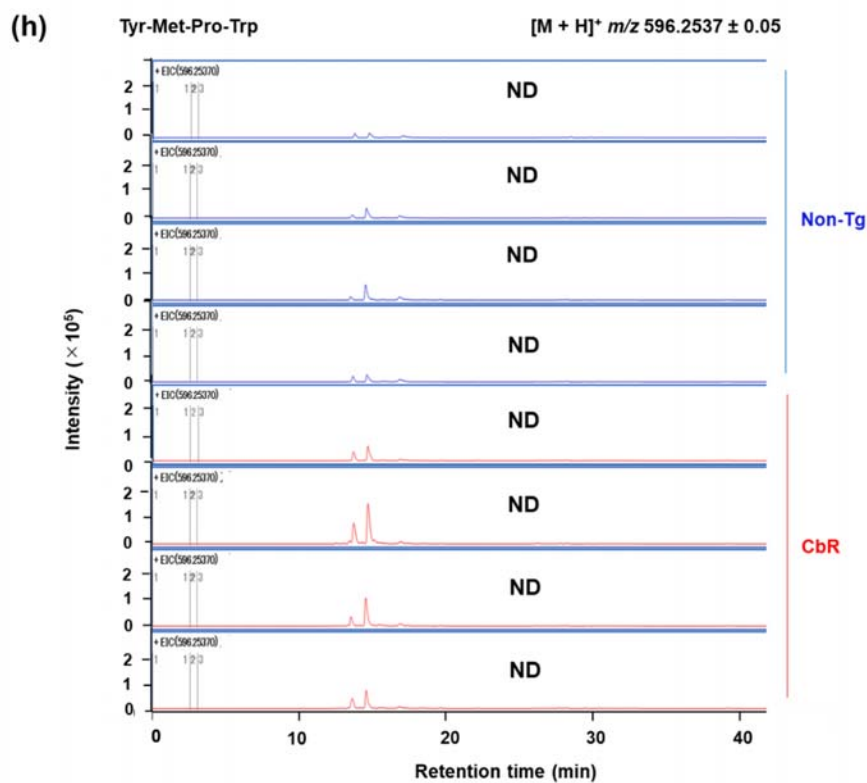

30

31 Supplementary Figure 2. Analysis of serum collected from mice fed with Non-Tg or CbR using  
32 LC-TOF/MS.

33 Mice were handled as described in Methods. Briefly, 6-week-old male Jcl:ICR mice (Japan SLC  
34 Inc., Shizuoka, Japan) were housed with access to a standard diet and water *ad libitum*. The mice  
35 were then fed with a diet containing either CbR or Non-Tg for 7 days, then their sciatic nerves  
36 were unilaterally transected under anesthesia. Seven days later, serum was separated from blood  
37 by centrifugation for 10 min at  $5,800 \times g$ , then stored at  $-80\text{ }^{\circ}\text{C}$ . Serum was deproteinized by  
38 precipitation with ice cold ACN containing 0.1% FA then centrifuged at  $14,000 \times g$  for 15 min.  
39 The supernatant was collected and dried using a centrifugal evaporator, and pellets were  
40 resuspended in 50  $\mu\text{L}$  of 0.1% FA and analyzed by LC-TOF/MS under conditions described in  
41 Methods. Extracted ions correspond to those of possible metabolites. Arrows indicate MS signals  
42 specific for CbR group. ND, not detected.

43

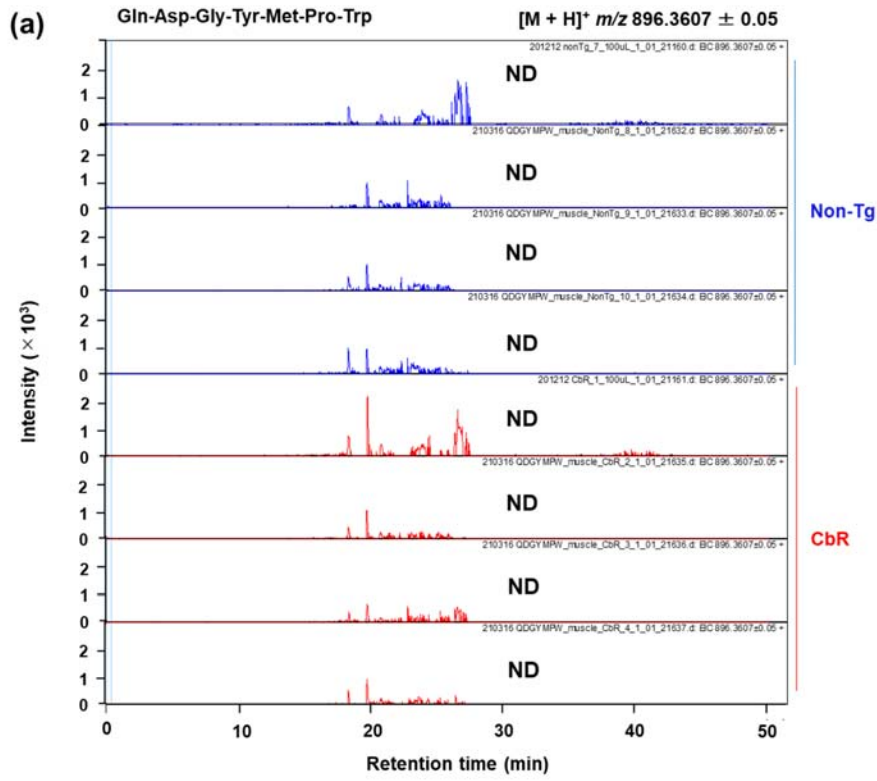

44

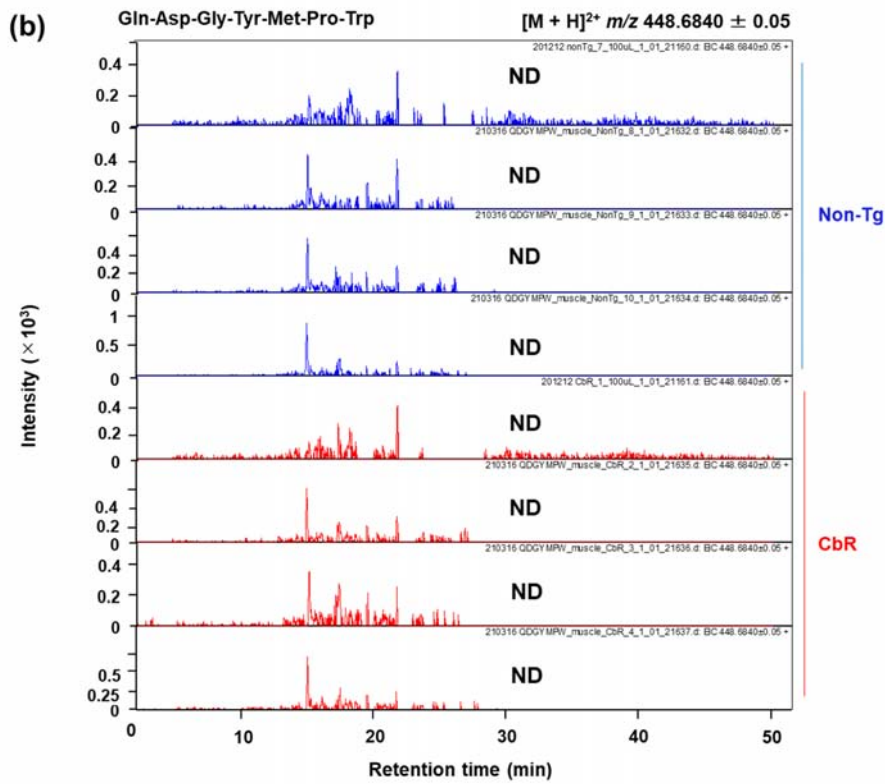

45





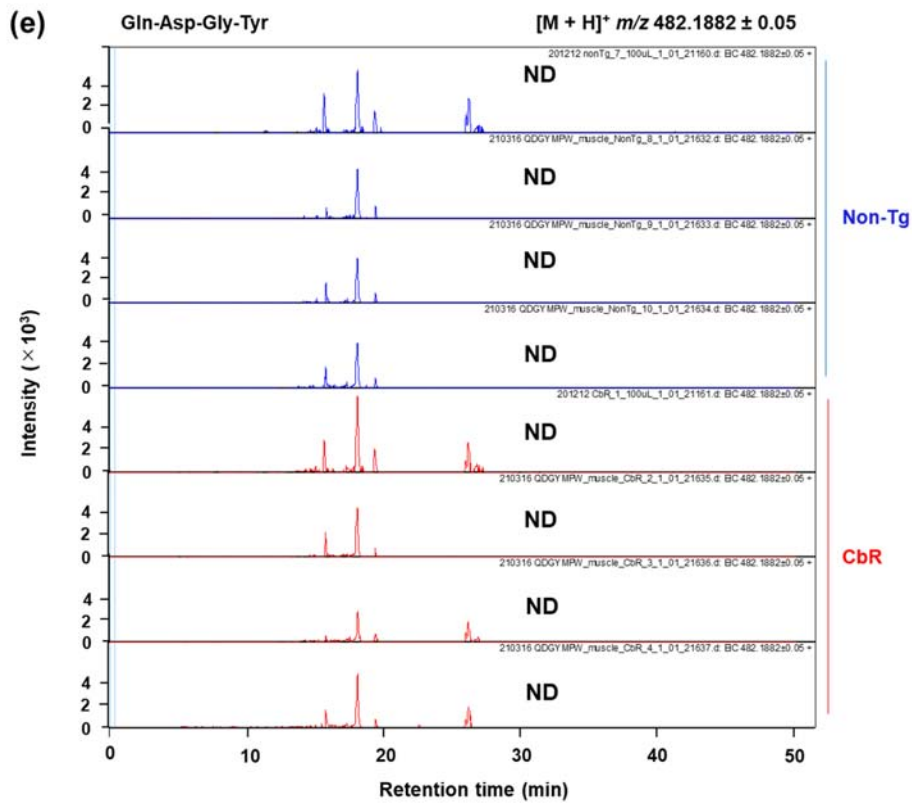

48

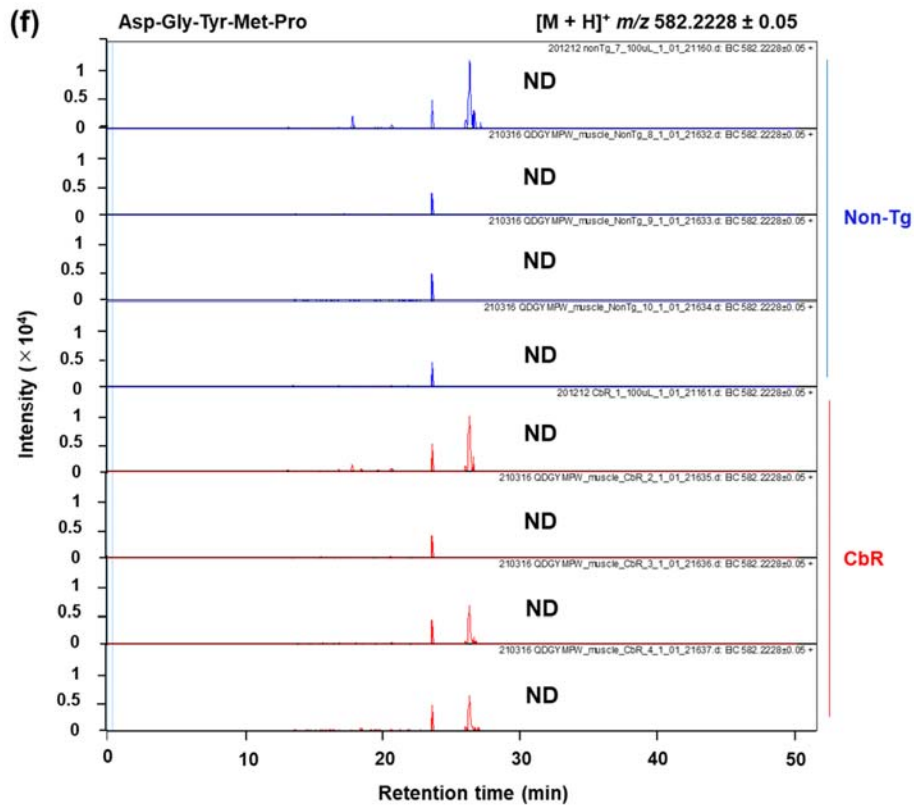

49

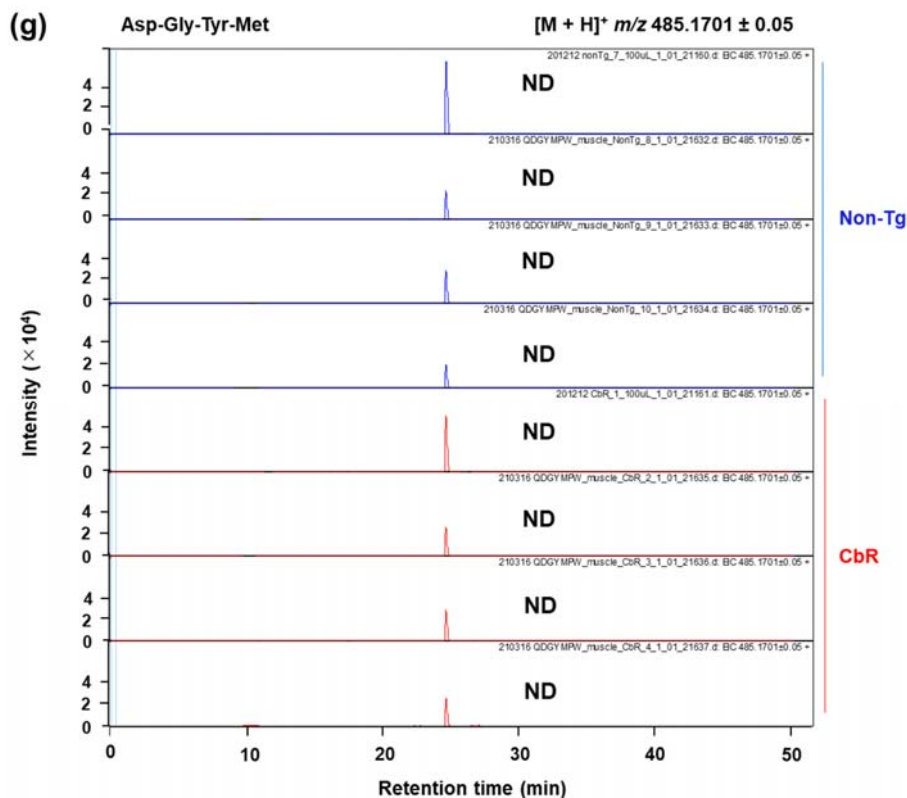

50

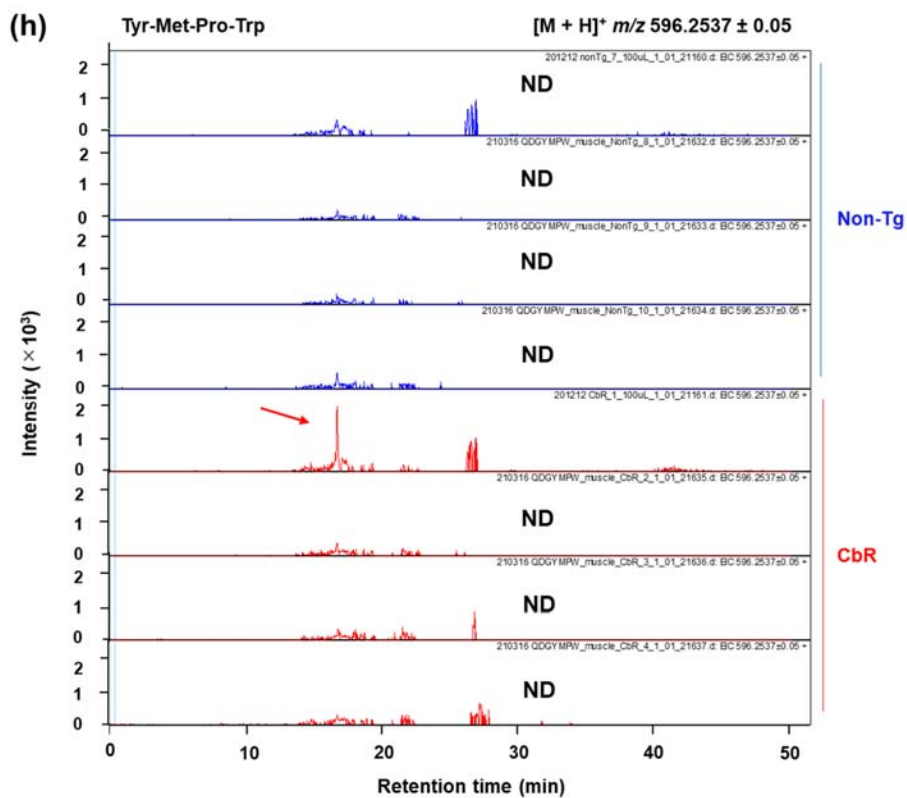

51

52 Supplementary Figure 3. LC-TOF/MS analysis of skeletal muscle collected from mice fed with  
53 Non-Tg or CbR.  
54 Mice were handled as shown in Methods and in Supplementary Fig. 2. Gastrocnemius (Ga)  
55 muscles stored at -80°C were homogenized in Tris-HCl buffer, pH 7.5, containing 150 mM  
56 NaCl, 5 mM EDTA, 1% TritonX-100, 10 mM NaF, 2 mM Na<sub>3</sub>VO<sub>4</sub>, 10 μM MG132, and protease  
57 inhibitor tablets (Roche Diagnostics). Lysates were precipitated with ice cold ACN containing  
58 0.1% FA, then separated by centrifugation at 14,000 × *g* for 15 min. Supernatants were collected  
59 and dried using a centrifugal evaporator. Pellets were resuspended in 100 μL of 0.1% FA and  
60 analyzed by LC-TOF/MS under conditions described in Methods. Extracted ions correspond to  
61 those of possible metabolites. Arrows indicate MS signals specific to CbR. ND, not detected.

62 Supplementary Table 1. Pharmacokinetics after a single oral administration of Asp-Gly-Tyr-Met-  
63 Pro at lower or higher doses in 8-wk SD rats.

| Measured parameters                             | Oral peptide dose (mg/kg BW) |        |
|-------------------------------------------------|------------------------------|--------|
|                                                 | 50                           | 200    |
| $C_{\max}$ (pmol/mL plasma)                     | 0.79                         | 27.25  |
| $t_{\max}$ (min)                                | 10                           | 30     |
| $AUC_{0-60 \text{ min}}$ (pmol · min/mL plasma) | 14.61                        | 648.91 |
| $t_{1/2}$ (min)                                 | 8.99                         | 5.58   |

64 Data are expressed as means (n = 1 per dose).  $AUC_{0-60 \text{ min}}$ , area under plasma concentration vs.  
65 time curve; BW, body weight;  $C_{\max}$ , maximum plasma concentration;  $t_{\max}$ , elapsed time to peak  
66 plasma concentration;  $t_{1/2}$ , elimination half-life.

67

68 Supplementary Table 2. Composition of diets.

|                                 | Standard diet<br>for acclimation | Non-Tg | CbR  |
|---------------------------------|----------------------------------|--------|------|
| Non-transgenic rice (g)         | -                                | 50.0   | -    |
| Cblin peptide-enriched rice (g) | -                                | -      | 50.0 |
| Casein (g)                      | 19.8                             | 16.6   | 16.6 |
| Corn starch (g)                 | 46.2                             | -      | -    |
| Lard (g)                        | 4.4                              | 3.5    | 3.5  |
| Sucrose (g)                     | 23.1                             | 23.4   | 23.4 |
| Cellulose (g)                   | 2.0                              | 2.0    | 2.0  |
| AIN93 vitamin mix (g)           | 1.0                              | 1.0    | 1.0  |
| AIN93 mineral mix (g)           | 3.5                              | 3.5    | 3.5  |
| Total (g)                       | 100                              | 100    | 100  |

69 CbR, rice enriched with transgenic Cblin pentapeptide; Non-Tg, non-transgenic rice.

70

71

72 Supplementary Table 3. Primer sequences.

| Gene         | Forward (5'→3')        | Reverse (5'→3')        |
|--------------|------------------------|------------------------|
| <i>Mafbx</i> | GGAAGCTTTCAACAGACTGGA  | CTCAGGGATGTGAGCTGTGA   |
| <i>Murfl</i> | ACGAGAAGAAGAGCGAGCTG   | CTTGGAAGGAGGAGGAGGAAGG |
| <i>Actb</i>  | CACACCTTCTACAATGAGCTGC | CATGATCTGGGTCACTTTTCA  |

73

74

75 Supplementary Table 4. Mass spectrometry of CbR-specific signals in mouse serum.

| $m/z$ [M + H] <sup>+</sup> | Predicted peptide sequence | RT (min)   |
|----------------------------|----------------------------|------------|
| 710.2814                   | Gln-Asp-Gly-Tyr-Met-Pro    | 17.5       |
| 613.2286                   | Gln-Asp-Gly-Tyr-Met        | 14.6       |
| 482.1882                   | Gln-Asp-Gly-Tyr            | 15.5       |
| 582.2228                   | Asp-Gly-Tyr-Met-Pro        | 18.0       |
| 485.1701                   | Asp-Gly-Tyr-Met            | 14.2, 15.4 |

76 Values ( $m/z$ ) correspond to predicted metabolites with  $\geq 4$  amino acid residues. CbR, rice  
77 enriched with transgenic Cblin pentapeptide; RT, retention time under LC-MS conditions  
78 described in legend to Supplementary Figure 2.
